# CDK1-mediated phosphorylation of the RII $\alpha$ regulatory subunit of PKA works as a molecular switch that promotes dissociation of RII $\alpha$ from centrosomes at mitosis

Cathrine R. Carlson<sup>1,\*</sup>, Oliwia Witczak<sup>1</sup>, Lutz Vossebein<sup>2</sup>, Jean-Claude Labbé<sup>3</sup>, Bjørn S. Skålhegg<sup>4</sup>, Guy Keryer<sup>5</sup>, Friedrich W. Herberg<sup>2</sup>, Philippe Collas<sup>1</sup> and Kjetil Taskén<sup>1</sup>

<sup>1</sup>Institute of Medical Biochemistry, University of Oslo, PO Box 1112 Blindern, N-0317 Oslo, Norway

<sup>2</sup>Ruhr-Universität Bochum, Institut für Physiologische Chemie, Abt. Für Biochemie Supramolekularer Systeme, 44801 Bochum, Germany

<sup>3</sup>Centre de Recherches de Biochimie Macromoléculaire, CNRS, BP 5051, 1919 Route de Mende, 34033 Montpellier Cedex 1, France

<sup>4</sup>Institute for Nutrition Research, University of Oslo, PO Box 1046 Blindern, N-0317 Oslo, Norway

<sup>5</sup>Institut Curie, Biologie du Cycle Cellulaire et de la Motilité, 75248 Paris Cedex 05, France.

\*Author for correspondence (e-mail: cathrine.carlson@basalmed.uio.no)

Accepted 10 June 2001

Journal of Cell Science 114, 3243-3254 (2001) © The Company of Biologists Ltd

## SUMMARY

Protein kinase A regulatory subunit RII $\alpha$  is tightly bound to centrosomal structures during interphase through interaction with the A-kinase anchoring protein AKAP450, but dissociates and redistributes from centrosomes at mitosis. The cyclin B-p34<sup>cdc2</sup> kinase (CDK1) has been shown to phosphorylate RII $\alpha$  on T54 and this has been proposed to alter the subcellular localization of RII $\alpha$ . We have made stable transfectants from an RII $\alpha$ -deficient leukemia cell line (Reh) that expresses either wild-type or mutant RII $\alpha$  (RII $\alpha$ (T54E)). When expressed, RII $\alpha$  detaches from centrosomes at mitosis and dissociates from its centrosomal location in purified nucleus-centrosome complexes by incubation with CDK1 *in vitro*. By contrast, centrosomal RII $\alpha$ (T54E) is not redistributed at mitosis, remains mostly associated with centrosomes during all phases of the cell cycle and cannot be solubilized by CDK1

*in vitro*. Furthermore, RII $\alpha$  is solubilized from particular cell fractions and changes affinity for AKAP450 in the presence of CDK1. D and V mutations of T54 also reduce affinity for the N-terminal RII-binding domain of AKAP450, whereas small neutral residues do not change affinity detected by surface plasmon resonance. In addition, only RII $\alpha$ (T54E) interacts with AKAP450 in a RIPA-soluble extract from mitotic cells. Finally, microtubule repolymerization from mitotic centrosomes of the RII $\alpha$ (T54E) transfectant is poorer and occurs at a lower frequency than that of RII $\alpha$  transfectants. Our results suggest that T54 phosphorylation of RII $\alpha$  by CDK1 might serve to regulate the centrosomal association of PKA during the cell cycle.

Key words: Centrosome, PKA, AKAP450, Mitosis, CDK1

## INTRODUCTION

The cAMP-dependent protein kinase (protein kinase A; PKA) is involved in the regulation of key cellular processes such as gene expression, metabolism and cell growth and division. PKA is a tetrameric enzyme consisting of two catalytic (C) subunits and one regulatory subunit (R) dimer, to which cAMP binds, thereby dissociating and activating the C subunits (Beebe and Corbin, 1986; Francis and Corbin, 1994). The PKA isozymes differ mainly in their R subunit composition and are divided into type I (RI $\alpha$ 2C<sub>2</sub> and RI $\beta$ 2C<sub>2</sub>) and type II (RII $\alpha$ 2C<sub>2</sub> and RII $\beta$ 2C<sub>2</sub>). The regulatory subunits RI $\alpha$  and RII $\alpha$  are present in almost all cell types, whereas expression of RI $\beta$  and RII $\beta$  is cell- and tissue-specific (Scott, 1991; Skålhegg and Taskén, 1997).

Tethering of PKA to subcellular loci via A-kinase anchoring proteins (AKAPs) is important to mediate the effects of cAMP. AKAPs target PKA close to its substrates and in this way contribute specificity in the cAMP-PKA signaling system.

Many AKAPs have been identified that are located in different cellular organelles and membranes (Colledge and Scott, 1999). Recently, two new AKAPs have been characterized that target PKA to centrosomes: AKAP350/AKAP450/CGNAP (Schmidt et al., 1999; Takahashi et al., 1999; Witczak et al., 1999) and pericentrin (Diviani et al., 2000). Whereas functions of AKAP450 are under investigation, pericentrin is a highly conserved component of the centrosomal matrix implicated in the organization of the mitotic spindle. Another AKAP (AKAP220) has also been localized to the centrosome area in developing germ cells and sperm (Reinton et al., 2000).

Centrosomes are major microtubule-organizing centers (MTOCs). During S phase, the cell duplicates its centrosome and, as prophase begins, the two daughter centrosomes separate and move to opposite positions in the cell. Each centrosome organizes its own array of microtubules. As the cell enters mitosis, the microtubule dynamics increase, enabling a rapid assembly and disassembly of the mitotic spindle. PKA modifies the microtubule dynamics and organization (Lamb et

al., 1991), and it is anticipated that the centrosomal and microtubular localization of PKA are implicated in these functions. It has been shown that PKA switches off the effects of stathmin (Gradin et al., 1998), a centrosome- and microtubule-associated phosphoprotein involved in the regulation of microtubule dynamics.

Both RII $\alpha$  and RII $\beta$  are found in the pericentriolar matrix of the centrosome during interphase (Keryer et al., 1999). At the onset of mitosis, the mitotic kinase CDK1 is associated with centrosomes (Bailly et al., 1989; Bailly et al., 1992) and RII $\alpha$  is phosphorylated by CDK1 on T54 and concomitantly dissociates from its centrosomal anchor (Keryer et al., 1998). Although RII $\beta$  contains a CDK1 phosphorylation site (T69; Keryer et al., 1993), it does not detach from the centrosome at mitosis. Together with the observation that normal differentiated cells and cancer cells have centrosomal RII $\beta$  (whereas normal dividing cells only express RII $\alpha$ ), cell cycle-dependent redistribution of RII $\alpha$  is interesting (Keryer et al., 1999). To study the mechanisms of redistribution of RII $\alpha$  and the functional implications of the detachment of RII $\alpha$  from centrosomes at mitosis, we made cell lines stably expressing wild-type and mutated RII $\alpha$ (T54E) on an RII $\alpha$ -deficient background (Reh cells; Taskén et al., 1993). Mutated RII $\alpha$ (T54E) was not phosphorylated by CDK1 and was retained at the mitotic centrosomes of the transfectants. CDK1 phosphorylation of wild-type RII $\alpha$  lowered the affinity for AKAP450 in vitro and dissociated RII $\alpha$  from purified centrosomes. This suggests that CDK1 phosphorylation serves as a molecular switch that regulates RII $\alpha$  association with centrosomal AKAPs.

## MATERIALS AND METHODS

### Cell growth and synchronization

Reh cells were grown at 37°C in RPMI medium (Gibco BRL) supplemented with 10% fetal calf serum, 2 mM glutamine, penicillin, streptomycin, 1mM sodium pyruvate and nonessential amino acids. Reh-RII $\alpha$ (T54E) cells (see below) were arrested in mitosis with 10  $\mu$ M nocodazole for 20 hours. Reh-RII $\alpha$  cells (see below) were accumulated by thymidine block (2.5 mM) for 20 hours and released for 9 hours before a second thymidine block and release for 9 hours. Then the cells were incubated with 1  $\mu$ M nocodazole for 4 hours. At least 50-60% of the cells were in mitosis without apoptosis after this treatment. The mouse A9 fibroblastic cell line was grown in  $\alpha$ -Eagle's minimum essential medium (MEM) supplemented with antibiotic/antimycotic, 0.1% tylosine tartrate, 40 mM  $\beta$ -mercaptoethanol, 2 mM L-glutamine and 10% fetal calf serum at 37°C. Primary cultures of fibroblast-like peritubular cells were prepared from rat testes and cultured in MEM with the addition of antibiotic/antimycotic, L-glutamine (2 mM) and 10% fetal calf serum at 32°C in a humidified atmosphere with 5% CO<sub>2</sub>.

### Transfection and GFP constructs

Wild-type RII $\alpha$  was mutated (Thr54 to Glu) as previously described (Keryer et al., 1998). The wild-type and mutated cDNAs were cloned into the expression vector pMEP4 (Invitrogen) as a *KpnI/BamHI* fragment and placed under the control of the human metallothionein IIa promoter. Reh cells (which are RII $\alpha$  deficient) were electroporated (320 V, 960  $\mu$ F) with 15  $\mu$ g of linearized constructs. Stably transfected cells were selected with hygromycin B (250  $\mu$ g ml<sup>-1</sup>). RII $\alpha$  and RII $\alpha$ (T54E) with *SacII/XhoI* ends were amplified using the above constructs as templates and subcloned into pEGFP-N1 to yield constructs directing expression of RII $\alpha$  with green fluorescent protein

(GFP) fused to the C terminus. Additional mutants, RII $\alpha$ (T54L)-GFP and RII $\alpha$ (T54V)-GFP were made by the mutation of Thr54 to Leu or Val, respectively. Reh cells (20 $\times$ 10<sup>6</sup>) were transfected with 20  $\mu$ g of DNA by electroporation (320 V, 960  $\mu$ F), incubated for 24-48 hours and analysed for GFP fluorescence.

### Antibodies and recombinant proteins

A mouse monoclonal antibody against human RII $\alpha$  (developed by K. Taskén in collaboration with Transduction Laboratories) was used at 1  $\mu$ g  $\mu$ l<sup>-1</sup> for western blotting and 2.5  $\mu$ g  $\mu$ l<sup>-1</sup> for immunoprecipitation and immunofluorescence. In some western blotting experiments, a polyclonal antiserum against human RII $\alpha$  (Keryer et al., 1999) was used at 1:500 dilution. An affinity-purified polyclonal antibody raised against AKAP 450 (a gift from W. A. Kemmer (Max Planck Institute for Development Biology, Tuebingen, Germany)) was used at 25  $\mu$ g  $\mu$ l<sup>-1</sup> for immunofluorescence and 0.1  $\mu$ g  $\mu$ l<sup>-1</sup> for immunoprecipitation. In the microtubule repolymerization experiments, we used an affinity-purified anti-RII $\alpha$  polyclonal antibody (4  $\mu$ g  $\mu$ l<sup>-1</sup>) and a monoclonal anti- $\alpha$ -tubulin at 0.1  $\mu$ g  $\mu$ l<sup>-1</sup> (Sigma, T-9026). A mouse monoclonal antibody against human RII $\beta$  (Transduction Laboratories) was used at a 1  $\mu$ g  $\mu$ l<sup>-1</sup> dilution for western blotting and immunofluorescence. HRP-conjugated anti-mouse IgGs (1:5000 dilution, Transduction Laboratories) and anti-mouse or anti-rabbit IgGs (1:10,000 dilution, Jackson Immunoresearch) were used as secondary antibodies. Recombinant human RII $\alpha$  wild-type was expressed as a glutathione-S-transferase (GST) fusion protein in the *Escherichia coli* strain BL21, purified and cleaved as described (Keryer et al., 1998). Two putative RII-binding domains in AKAP450 were expressed as fusion proteins referred to as GST-AKAP450 (amino acids 1390-1595) and GST-AKAP450 (amino acids 2327-2602). GST-AKAP79 (amino acids 178-427) and GST-AKAP149 (amino acids 285-387) were expressed as previously described (Herberg et al., 2000). For the surface plasmon resonance (SPR) experiments, wild-type and mutated RII $\alpha$  (Thr54 to Ala (T54A), Asp (T54D), Leu (T54L) or Val (T54V)) were cloned into pRSET, expressed in the *E. coli* strain BL21 and purified by using cAMP coated beads as described (Herberg et al., 2000).

### Immunofluorescence

Immunofluorescence analysis of cells or nucleus-centrosome complexes was done as previously described (Collas et al., 1996). TRITC- or FITC-conjugated secondary antibodies were used at 1:100 dilution and DNA was stained with 0.1  $\mu$ g ml<sup>-1</sup> Hoechst 33342. Observations were made and photographs were taken as previously described (Collas et al., 1999).

### Immunoprecipitation and phosphorylation

Whole cells were sonicated and extracted in RIPA buffer (150 mM NaCl, 1% NP-40, 0.5% deoxycholate, 0.1% SDS, 50 mM Tris pH 8.0) and the lysate centrifuged at 13,000g. The supernatant was precleared with protein A/G agarose (1:25 dilution) and RII $\alpha$  was immunoprecipitated using anti-RII $\alpha$  mAb (2.5  $\mu$ g  $\mu$ l<sup>-1</sup>). To phosphorylate RII $\alpha$ , the beads containing the immune complexes were prewashed in EBS phosphorylation buffer (80 mM sodium  $\beta$ -glycerophosphate, 20 mM EGTA, 15 mM MgCl<sub>2</sub>, 100 mM sucrose, 1 mM dithiothreitol, pH 7.2) before incubation with 100  $\mu$ M ATP and purified starfish oocyte CDK1 (mitotic kinase) (Labbé et al., 1989) (9 pmol minute<sup>-1</sup>  $\mu$ l<sup>-1</sup>) for 45 minutes at 22°C.

### Electrophoresis and immunoblotting

Proteins were separated by 7.5% or 10% SDS-PAGE containing 16% glycerol in the separating gel or 4.5% PAGE containing 2 M urea and transferred by electroblotting to PVDF membranes. The filters were blocked in 5% non-fat dry milk in PBS for 1 hour, incubated overnight at 4°C with primary antibodies, washed for 1 hour in PBS with 0.1% Tween-20 and incubated with a horseradish-peroxidase-conjugated secondary antibody. Blots were developed by enhanced chemiluminescence (Amersham). For RII overlay, filters were

blocked, incubated with [ $^{32}$ P]-RII $\alpha$  and washed in blotto/BSA (0.1% BSA, 0.02% Na-azide, 0.05% Tween-20, 5% nonfat dried milk in PBS) solution as described previously (Bregman et al., 1989).

### CDK1 phosphorylation of RII $\alpha$ in Triton-X-100-insoluble fractions and purified nucleus-centrosome complexes

Interphase cells ( $20 \times 10^6$ ) were washed in PHEM buffer (45 mM Pipes, 45 mM Hepes, 10 mM EGTA, 5 mM MgCl $_2$ , pH 6.9) containing anti-proteases (10  $\mu$ g ml $^{-1}$  each of antipain, chymostatin, leupeptin and pepstatin A) and phosphatase inhibitors (1  $\mu$ M okadaic acid and 0.1 mM sodium orthovanadate). The cells were pelleted (400g) and then extracted in the same buffer containing 0.5% Triton X-100; Triton-X-100-soluble and -insoluble fractions were separated by centrifugation. The Triton-X-100-insoluble fraction was sonicated twice for 10 seconds each, washed twice in EBS phosphorylation buffer (described above) before incubation for 30 minutes at 22°C with 100  $\mu$ M ATP and CDK1 (30 pmol minute $^{-1}$   $\mu$ l $^{-1}$ ). The pellet and supernatant were subsequently separated by centrifugation and both fractions were boiled in Laemmli buffer and analyzed for the amount of RII by western blotting. Nucleus-centrosome complexes were purified according to Maro and Bornens (Maro and Bornens, 1980) from cells by resuspension in cold buffer containing 0.25 M sucrose, 10 mM NaCl, 3 mM MgCl $_2$ , 0.5 mM PMSF, 1 mM dithiothreitol, 10 mM Tris-HCl, pH 7.4, with protease inhibitors. NP-40 was added to a final concentration of 0.5% and the cells were disrupted by vortexing for 15 seconds. Nucleus-centrosome complexes were pelleted at 200g for 10 minutes and washed in PHEM buffer containing 0.5% Triton X-100. After pelleting, the complexes were resuspended in EBS phosphorylation buffer and incubated in presence or absence of CDK1 and 100  $\mu$ M ATP.

### RII overlays

Purified recombinant human RII $\alpha$  and purified bovine RII $\alpha$  were radiolabeled by purified CDK1 or catalytic subunit (C) of PKA and [ $\gamma$ - $^{32}$ P] ATP. RII $\alpha$  (1.5  $\mu$ g) was incubated with CDK1 (24 pmol minute $^{-1}$   $\mu$ l $^{-1}$ ) in EBS buffer (described above) containing 0.7  $\mu$ Ci  $\mu$ l $^{-1}$  of [ $\gamma$ - $^{32}$ P] ATP for 1 hour at 22°C. Phosphorylation by PKA was done using 0.7  $\mu$ Ci  $\mu$ l $^{-1}$  of [ $\gamma$ - $^{32}$ P] ATP and 24 pmol minute $^{-1}$   $\mu$ l $^{-1}$  of active C for 1 hour at 0°C. PKA- and CDK1-labeled RII $\alpha$  (6 nM final concentration each;  $4.9 \times 10^5$  cpm  $\mu$ g $^{-1}$  and  $2.4 \times 10^4$  cpm  $\mu$ g $^{-1}$ , respectively) was purified by gel filtration (G-25 sepharose) and used in a modified western blot protocol as previously described (Bregman et al., 1989).

### GST precipitation

R subunit (50 ng) was incubated in 20  $\mu$ l EBS phosphorylation buffer (described above) containing 100  $\mu$ M ATP for 1 hour at 22°C in presence or absence of purified CDK1 (10 pmol minute $^{-1}$   $\mu$ l $^{-1}$ ). The R subunit was then diluted to 20 nM, mixed with 20 nM of different GST-AKAP fragments in a buffer containing 50 mM Tris-HCl, pH 7.4, 300 mM NaCl, 1 mM dithiothreitol, 1 mM PMSF, 0.1% Triton X-100, 20 mM EDTA (to inactivate CDK1), 5 mM benzamide, protease inhibitors and incubated at room temperature for 30 minutes with rotation. Subsequently, 25  $\mu$ l of glutathione-agarose beads were added and incubation continued further for 2 hours at 4°C with rotation, after which beads were pelleted by centrifugation at 1000g for 5 minutes and washed three times in 300  $\mu$ l of the same buffer. Precipitates were eluted by boiling in SDS-sample buffer, subjected to SDS-PAGE and immunodetection of RII $\alpha$ .

### Surface plasmon resonance (SPR)

Recombinant RII $\alpha$  was purified over a 8-amino-hexyl-amino-cAMP resin (Biolog, Bremen) and quality tested as described before (Herberg et al., 2000). To obtain cAMP-free RII $\alpha$ , RII $\alpha$  was unfolded with 6 M urea and refolded in buffer A (150 mM NaCl, 20 mM MOPS, pH 7.0, 0.005% surfactant P20 (Biacore AB)) (Buechler et al., 1993). Studies on the interaction between the RII $\alpha$  of PKA and AKAP protein were performed by SPR spectroscopy using a Biacore

2000 instrument (Biacore AB, Sweden) and a CM5 chip coated with 8-AHA cAMP as described before (Herberg et al., 2000). For review of the SPR technique, see Szabo et al. (Szabo et al., 1995). The surface concentration of wild-type and mutant RII $\alpha$  proteins was adjusted to 120 or 500 RU for analysis of interaction with GST-AKAP450 (1390-1595) and GST-AKAP450 (2327-2602) (fusions of GST with the two putative RII-binding domains or AKAP450 (Schmidt et al., 1999, Witczak et al., 1999)). A response (i.e. a change in the resonance signal) of 1000 Relative Units (RU) corresponds to a change in surface concentration on the sensor chip of about 1 (ng protein) mm $^{-2}$  (Stenberg and Nygren, 1991).

### Microtubule repolymerization assay

Cells were settled onto freshly L-lysine-coated coverslips for 30 minutes at 25°C. Microtubules were depolymerized at 4°C for 1 hour in medium. The polymerization was initiated by incubating the cells in RPMI medium at 37°C. Microtubule regrowth was stopped after 0-15 minutes by fixing with ice-cold 100% methanol. The cells were prepared for immunofluorescence as described above, except that a cytoskeleton stabilization buffer (PHEM buffer) was used instead of PBS.

### Statistical analysis

For comparison of two groups, the Mann-Whitney *U* test was used. Statistical analysis was performed using Statistica (Statsoft, Tulsa, OK). *P* values are two-sided and are considered significant when <0.05.

## RESULTS

### Subcellular localization of RII $\alpha$ in Reh-RII $\alpha$ and Reh-RII $\alpha$ (T54E) cells

Stably transfected cell lines expressing wild-type RII $\alpha$  or RII $\alpha$ (T54E) were generated. RII $\alpha$  was detected in the cell lines transfected with wild-type RII $\alpha$  (Reh-RII $\alpha$ ) (Fig. 1A, lane 3) and mutated RII $\alpha$  (Reh-RII $\alpha$  (T54E), lane 4). Both cell lines expressed similar levels of RII $\alpha$  (51 kDa). RII $\alpha$  was not detected in the untransfected Reh cells (lane 1) or in Reh transfected with vector (Reh-pMEP4) (lane 2). Next, RII $\alpha$  immunoprecipitates from different cell lines were subjected to CDK1 phosphorylation in the presence of ATP. Only RII $\alpha$  immunoprecipitated from Reh-RII $\alpha$  cells was phosphorylated and migrated with apparent mobility of 53 kDa (Fig. 1B, lower panel, lane 2), although both Reh-RII $\alpha$  and Reh-RII $\alpha$ (T54E) cells contained RII $\alpha$  (upper panel). Consistent with our earlier observations (Keryer et al., 1998), this indicates that the human RII $\alpha$  sequence (AAT $^{54}$ PRQSL) contains a CDK1 phosphorylation site at T54.

The subcellular localization of RII $\alpha$  in the different cell lines was determined by double immunofluorescence using anti-RII $\alpha$  monoclonal antibody (mAb) and an affinity-purified polyclonal antibody raised against AKAP450 to detect centrosomes (Fig. 1C-E). RII $\alpha$  was detected in the Golgi/centrosomal region in interphase Reh-RII $\alpha$  and Reh-RII $\alpha$ (T54E) cells but was absent from untransfected Reh cells. In mitotic Reh-RII $\alpha$  cells, RII $\alpha$  was dissociated from centrosomes and redistributed to the cytoplasm and chromatin. Variable amount of RII $\alpha$  was colocalized with chromatin in mitotic RII $\alpha$ -transfected Reh cells, whereas association was observed to be stronger in other cell types (Landsverk et al., 2001; Collas et al., 1999). By contrast, mutant RII $\alpha$  remained associated within centrosomes in mitotic Reh-RII $\alpha$ (T54E)



**Fig. 1.** Subcellular distribution of RII $\alpha$  in cell lines expressing wild-type or mutant (T54E) RII $\alpha$ .

(A) Analysis of RII $\alpha$  expression in stably transfected cell lines. Interphase cells ( $2 \times 10^6$  cells per lane) were subjected to SDS-PAGE and immunoblotting with a polyclonal antibody against human RII $\alpha$ . Lanes: 1, wild-type Reh (RII $\alpha$ -deficient); 2, Reh-pMEP4 (vector transfected); 3, Reh-RII $\alpha$ ; 4, Reh-RII $\alpha$ (T54E). (B) RII $\alpha$  was immunoprecipitated from interphase lysates ( $4 \times 10^7$  cells per lane) of Reh-RII $\alpha$  (lane 2) and Reh-RII $\alpha$ (T54E) (lane 3) cells. Precipitation from Reh was performed as control (lane 1). Half of the immune precipitates were immunoblotted using a anti-RII $\alpha$  polyclonal antibody (upper panel). The other half was incubated for 45 minutes at 22°C in EBS phosphorylation buffer with [ $\gamma$ - $^{32}$ P]ATP in the presence of CDK1 ( $9 \text{ pmol minute}^{-1} \mu\text{l}^{-1}$ ), separated by SDS-PAGE, dried and subjected to autoradiography (lower panel). The positions of non-phosphorylated (51 kDa) and phosphorylated (53 kDa) RII $\alpha$  are indicated. (C-E) Interphase (I) and mitotic (M) Reh cell lines (C), mouse A9 fibroblasts (D) and primary cultures of peritubular cells prepared from rat testes (fibroblast-like) (E) were analyzed by immunofluorescence using anti-RII $\alpha$  (upper panel; red in C and D, green in E) or anti-RII $\beta$  mAbs (lower panel; green in E) and an affinity-purified polyclonal antibody against AKAP450 (green in C and D, red in E). DNA was stained with Hoechst 33342 (blue). Arrows indicate mitotic centrosomes. Bar: 10  $\mu\text{m}$ . (F) CDK1 phosphorylation of purified recombinant human (lane 1) and bovine (lane 2) RII $\alpha$  (150 ng of each). The positions of phosphorylated RII $\alpha$  (lanes 1 and 2) and autophosphorylated cyclin B (49 kDa, lane 3) are indicated.

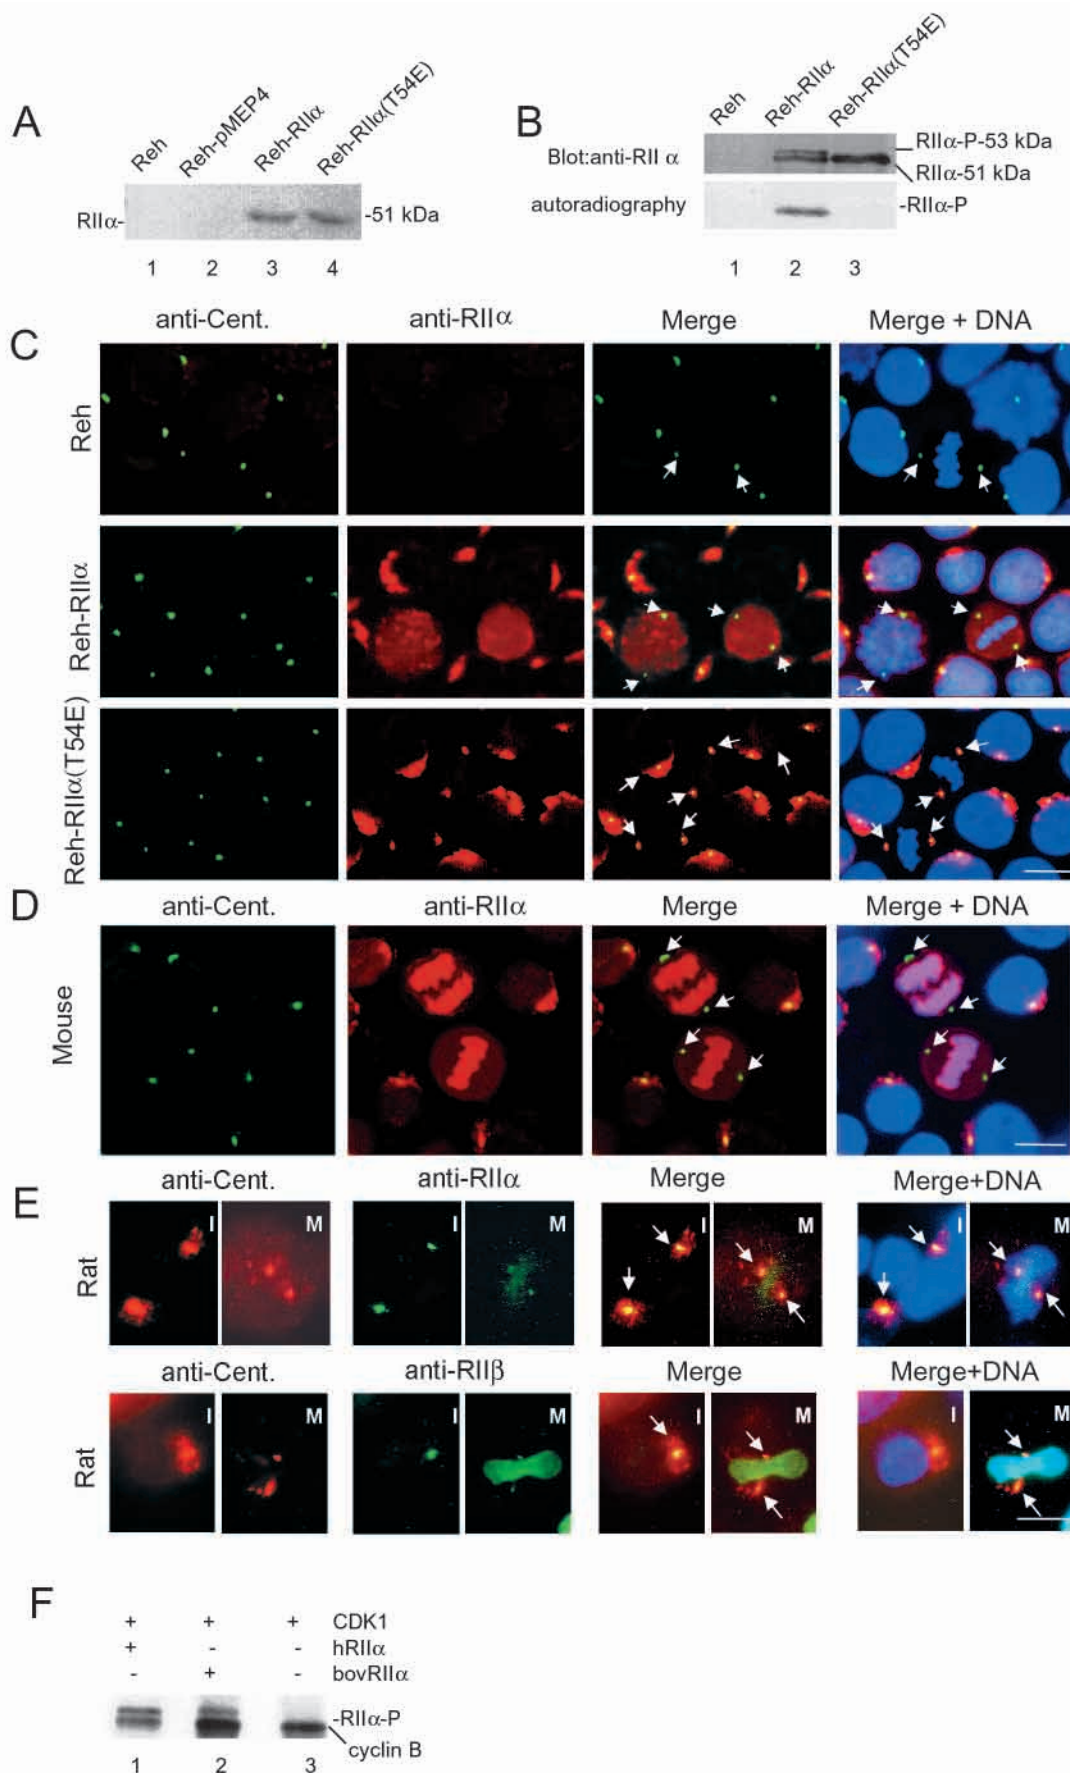

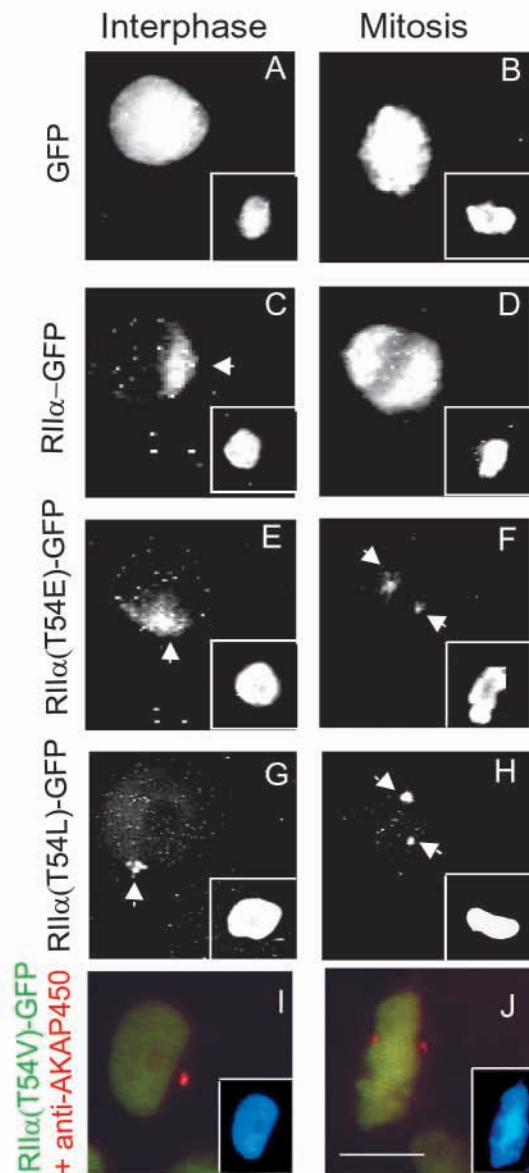

**Fig. 2.** Different locations of wild-type and mutated RII $\alpha$ -GFP in mitotic cells. Reh cells were transiently transfected with GFP (A,B), RII $\alpha$ -GFP (C,D), RII $\alpha$ (T54E)-GFP (E,F), RII $\alpha$ (T54L)-GFP (G,H) or RII $\alpha$ (T54V)-GFP (I,J), fixed and stained with affinity-purified anti-AKAP450 polyclonal antibodies to stain centrosomes (I,J) and with Hoechst 33342 to stain DNA (inserts). GFP fluorescence was examined in interphase (A,C,E,G,I) and mitotic (B,D,F,H,J) cells. Arrows indicate the centrosomal association of RII $\alpha$ .

cells. Thus, the two RII $\alpha$  proteins expressed in Reh-RII $\alpha$  and Reh-RII $\alpha$ (T54E) cells were differently localized in mitotic cells. Because RII $\alpha$ (T54E) could not be phosphorylated by CDK1, this suggests that cell cycle redistribution of RII $\alpha$  at mitosis correlates with CDK1 phosphorylation. Cell-cycle-dependent localization of RII $\alpha$  was also observed in mouse fibroblasts (Fig. 1D), indicating that this redistribution also occurs in cell lines from other species. By contrast, RII $\alpha$  was not redistributed at mitosis in fibroblast-like primary cultures of peritubular cells from the rat testis, but were found to be associated with the centrosomal region (Fig. 1E). These observations are consistent with the presence of an N-terminal

CDK1 phosphorylation site in mouse (IVS<sup>49</sup>PTTFH) and the lack of a corresponding site in rat RII $\alpha$  peptide sequence (IAPPTTFH). In the rat, however, the RII $\beta$  subunit seemed to associate more strongly with mitotic chromatin (Fig. 1E, bottom row). Last, we tested whether bovine RII $\alpha$  was accessible for CDK1 phosphorylation. Bovine RII $\alpha$  was incubated with CDK1 and ATP, and detected by immunoblotting. Fig. 1F shows that purified bovine RII $\alpha$  (lane 2), like human RII $\alpha$  (lane 1), was phosphorylated in vitro by CDK1 with a change in electrophoretic mobility from 56 kDa to 58 kDa. The phosphorylated polypeptide at 49 kDa observed in the presence of CDK1 alone corresponds to autophosphorylated cyclin B (lane 3).

### Subcellular location of RII $\alpha$ -GFP and RII $\alpha$ (T54E, L or V)-GFP in Reh cells

We next examined the distribution of wild-type and mutant RII $\alpha$  by GFP tagging in transiently transfected Reh cells. To avoid disruption of the dimerization and AKAP-binding domains of RII $\alpha$ , the GFP coding sequence was fused to the C terminus of the open reading frame of wild-type or mutated RII $\alpha$  in the vector pEGFP-N1 and transfected into Reh cells. As a negative control, we transfected Reh cells with vector expressing GFP only. Examination of transfected cells by fluorescence microscopy revealed that GFP alone was localized both in the cytoplasm and nucleus-chromatin of interphase and mitotic cells (Fig. 2A,B). RII $\alpha$ -GFP, RII $\alpha$ (T54E)-GFP and RII $\alpha$ (T54L)-GFP were localized to the Golgi/centrosome region in interphase cells (Fig. 2C,E,G). In mitotic cells, most of the RII $\alpha$ -GFP was localized to the cytoplasm but some weaker fluorescence also overlapped with chromatin (Fig. 2D). By contrast, RII $\alpha$ (T54E)-GFP and RII $\alpha$ (T54L)-GFP were still attached to the mitotic centrosomes (Fig. 2F,H). We conclude that the GFP fusion proteins are localized similarly to the proteins expressed in the stable transfectants. Cells transfected with RII $\alpha$ (T54V)-GFP did not display any centrosomal RII $\alpha$ -GFP staining (Fig. 2I,J, centrosomes evident from double staining with anti-AKAP450 antibody), although centrosomes were visualized by staining with anti-AKAP450 antibody (red). These observations are consistent with the low affinity of AKAP450 for this mutant protein as measured by SPR (Table 1).

### RII $\alpha$ is solubilized by CDK1-phosphorylation in Reh-RII $\alpha$ , but not in RII $\alpha$ (T54E) cells

In contrast to RII $\alpha$ , RII $\alpha$ (T54E) was neither phosphorylated by CDK1 nor redistributed at mitosis and remained associated with the centrosomes. Because of this, we wanted to analyze the solubility of RII $\alpha$  in the transfected cell lines. Triton-X-100-insoluble fractions of Reh-RII $\alpha$  and Reh-RII $\alpha$ (T54E) interphase cells were incubated with or without CDK1 and ATP. Supernatant and particulate fractions were subsequently separated by centrifugation and the distribution of RII $\alpha$  was analyzed by immunoblotting (Fig. 3A). The 51 kDa and 53 kDa RII $\alpha$  were the major isoforms and were detected both in pellet (Fig. 3A, lanes 2-5) and supernatant (Fig. 3A, lanes 6-9) fractions from the two cell lines. The levels of the different RII $\alpha$  isoforms in each lane (Fig. 3A) were quantified by densitometry (Fig. 3A, histogram). A decrease in the amount of particulate RII $\alpha$  protein was seen for Reh-RII $\alpha$  after incubation with CDK1 (lane 3), with a corresponding increase

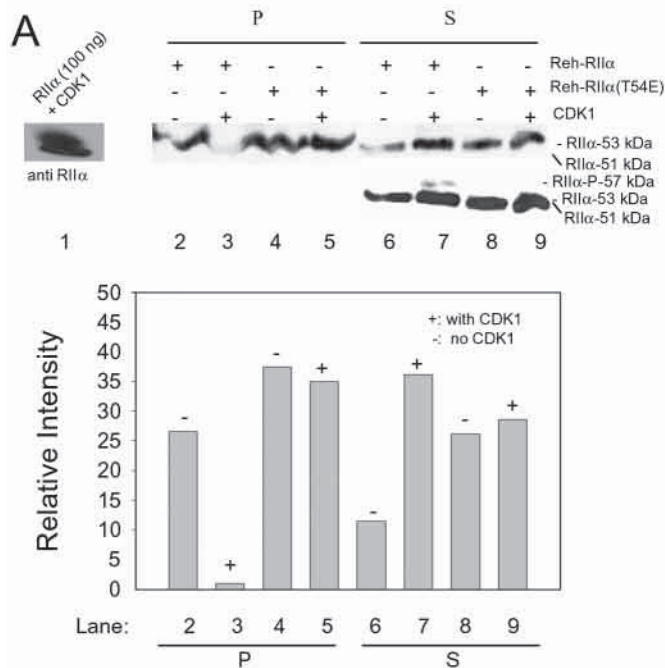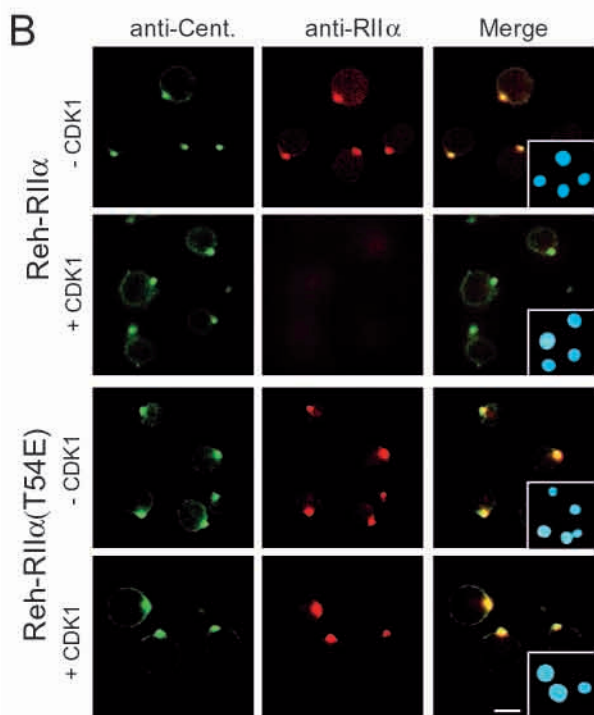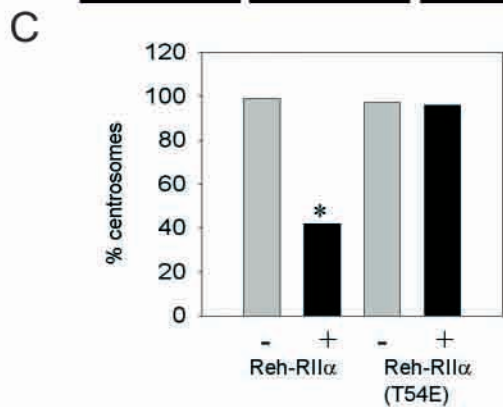

**Fig. 3.** Displacement of RII $\alpha$  from Reh-RII $\alpha$  but not Reh-RII $\alpha$ (T54E) centrosomes after CDK1 phosphorylation. (A) Proteins from the Triton-X-100-insoluble fractions of Reh-RII $\alpha$  and Reh-RII $\alpha$ (T54E) interphase cells were incubated (for 45 minutes at 22°C in EBS phosphorylation buffer with 100  $\mu$ M ATP) in the presence (lanes 3,5,7,9) or absence (lanes 2,4,6,8) of CDK1. After incubation, pellet (P; lanes 2-5) and supernatant (S; lanes 6-9; lower panel shows longer exposure) were separated by centrifugation and subjected to SDS-PAGE, and RII $\alpha$  was immunodetected with anti-hRII $\alpha$  mAb. The level of immunoreactive RII $\alpha$  in each lane (in upper panel) was evaluated by densitometric scanning and relative intensities are given in the lower panel. As a positive control, 100 ng of human recombinant RII $\alpha$  was incubated with CDK1 before the immunodetection (lane 1). (B) The localization of RII $\alpha$  was analyzed by immunofluorescence in centrosome-nucleus complexes of interphase Reh-RII $\alpha$  and Reh-RII $\alpha$ (T54E) cells before and after incubation with CDK1. The location of RII $\alpha$  and centrosomes was determined using anti-RII $\alpha$  mAb (red) and anti-affinity purified anti-AKAP450 polyclonal antibodies (green). Inserts: DNA was stained with Hoechst 33342 (blue). Bars: 10  $\mu$ m. (C) The percentage of centrosomes staining for RII $\alpha$  before (-) and after (+) CDK1 incubation is given ( $n=200$ ; \* means  $P<0.001$ ). One representative experiment of two or more is shown for all panels.

of RII $\alpha$  in the soluble fraction (lane 7). In addition, after longer exposure a phosphorylated 57-kDa RII $\alpha$  isoform was also observed in the soluble fraction of Reh-RII $\alpha$  after incubation with CDK1 (Fig. 3A, lane 7, lower blot), which most probably represents the PKA-RII $\alpha$  double phosphorylated by PKA and CDK1 (Keryer et al., 1998). The levels in the pellet and supernatant fractions (lanes 5 and 9) of Reh-RII $\alpha$ (T54E) were unchanged after CDK1 incubation. Thus, RII $\alpha$  but not RII $\alpha$ (T54E) was solubilized by CDK1 phosphorylation.

To examine the solubilization of RII $\alpha$  further, nucleus-centrosome complexes from the two cell lines were isolated and incubated in presence or absence of CDK1 and ATP. Double immunofluorescence staining showed that RII $\alpha$  was initially attached to centrosomes but dissociated after CDK1 incubation (Fig. 3B). By contrast, RII $\alpha$ (T54E) remained attached to centrosomes regardless of the CDK1 treatment. Approximately 70% of the isolated nuclei were associated with centrosomes after purification. The number of centrosomes staining for RII $\alpha$  or RII $\alpha$ (T54E) was scored from 200 nucleus-centrosome complexes. After CDK1 treatment, only 42% of centrosomes from Reh-RII $\alpha$  complexes stained for RII $\alpha$  and, in addition, this staining was dim ( $P<0.001$ ) (Fig. 3C). By contrast, 96% of the centrosomes from Reh-RII(T54E) complexes stained strongly for RII $\alpha$  after CDK1 treatment. The results suggest that phosphorylation of T54 is a determining factor for dissociation of RII $\alpha$  from centrosomes.

#### RII $\alpha$ (T54E), but not RII $\alpha$ , immunoprecipitates with AKAP450 in mitotic cells

RII $\alpha$  has been shown to bind the A-kinase anchoring protein AKAP450 in purified centrosomal fractions from KE37 lymphoblast cells (Witczak et al., 1999). We analyzed the association of the RII $\alpha$  with AKAP450 in Reh-RII $\alpha$  and Reh-RII $\alpha$ (T54E) cells by immunoprecipitation. Mitotic and interphase cells were lysed and the RII $\alpha$ -AKAP450 complex was immunoprecipitated using anti-RII $\alpha$  antibody. Precipitates



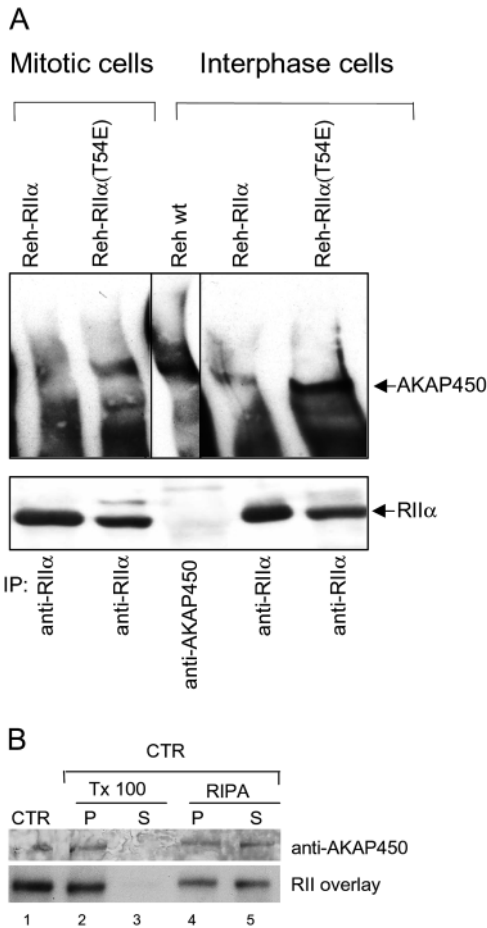

were separated on a 4.5% acrylamide gel containing 2 M urea, and AKAP450 was detected by anti-AKAP450 antibody. As a control, we immunoprecipitated AKAP450 with anti-AKAP450 antibody from wild-type Reh cells. The presence of

**Fig. 4.** (A) Co-immunoprecipitation of AKAP450 with anti-RIIα from Reh-RIIα and Reh-RIIα(T54E) cells in interphase and mitosis (obtained by double thymidine block). The upper panel shows immunoprecipitation of RIPA-buffer extracts of 200×10<sup>6</sup> cells using anti-RIIα antibody. As a control, Reh cells were immunoprecipitated with anti-AKAP450 antibody. Samples were separated by 4.5% PAGE containing 2 M urea, transferred to nitrocellulose and detected using anti-AKAP450 antibodies. The AKAP450 band is indicated by an arrow. The lower panel shows the RIIα content in the precipitated samples. (B) Immunospecificity of the affinity-purified polyclonal AKAP450 antibodies. Lane 1 contains purified centrosomes (untreated); lanes 2 and 3 contain Triton-X-100 insoluble and -soluble fractions from the centrosomal preparation in lane 1, respectively; lanes 4 and 5 contain RIPA-insoluble and -soluble centrosomal fractions, respectively. The blot was analyzed by RII overlay (lower panel) and western blotting using the affinity-purified polyclonal AKAP450 antibodies (upper panel).

RIIα and RIIα(T54E) was analyzed by immunoblotting. AKAP450 immunoprecipitated with RIIα from interphase lysates of both Reh-RIIα and Reh-RIIα(T54E) (Fig. 4A). In the mitotic lysates, AKAP450 was detected in the RIIα-immunoprecipitates from Reh-RIIα(T54E) but not in precipitates from Reh-RIIα. This is consistent with the cell cycle redistribution of RIIα to chromatin at mitosis (Fig. 1C,D). We conclude that the redistribution of RIIα from centrosomes at mitosis occurs by dissociation from AKAP450. As a control, the immunospecificity of the affinity-purified polyclonal AKAP450 antibodies was assessed by immunoblot analysis of centrosomal preparations (Fig. 4B, upper panel, lane 1). This revealed a 450-kDa band that was resistant to detergent extraction (lanes 2 and 3) and partly solubilized by RIPA buffer extraction (lanes 4 and 5). RII overlay of the same blot to detect AKAPs (Fig. 4B, lower panel) demonstrated a band of the same mobility and distribution as that of the immunoreactive band (upper panel). We conclude that the immunoreactivity of the antibody is consistent with the characteristics of AKAP450.

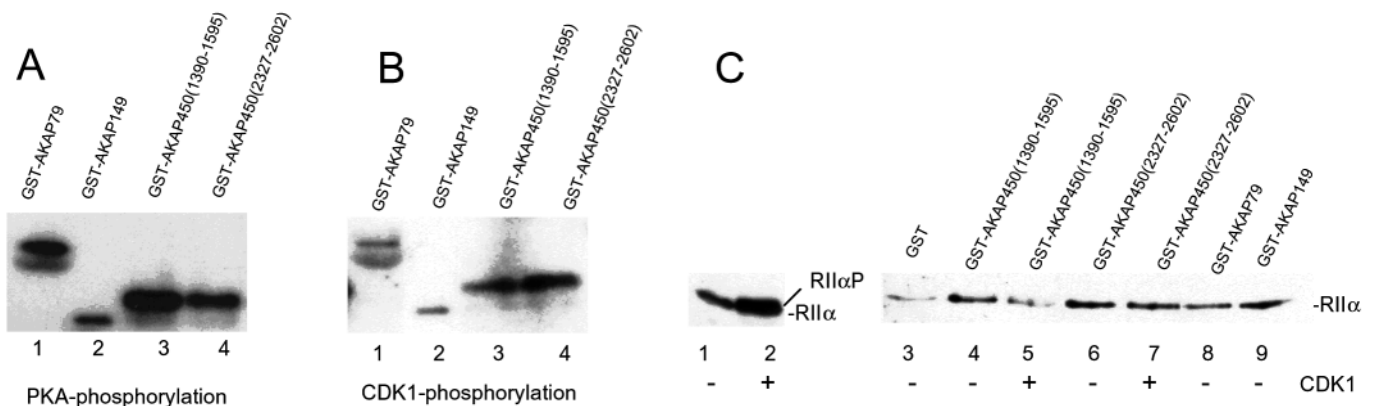

**Fig. 5.** Phosphorylated RIIα binds with different affinity to the RII-binding motifs in AKAP450. Purified recombinant human RIIα was radiolabeled using the catalytic subunit of either PKA (A) or CDK1 (B) and used for overlays on blots with different AKAPs (100 ng). Lanes: 1, GST-AKAP79 (178-427); 2, GST-AKAP149 (285-387); 3, GST-AKAP450 (1390-1595); 4, GST-AKAP450 (2327-2602) (numbers indicate the amino acid extent of the recombinant fragments used). (C) Precipitation of RIIα isoforms with different GST-AKAPs (20 nM of both R and AKAP). In some experiments, RIIα was preincubated with CDK1 before the GST precipitation. Lanes: 1, RIIα (50 ng); 2, RIIα after CDK1 preincubation; 3, GST + RIIα (negative control); 4, GST-AKAP450 (1390-1595) + RIIα; 5, GST-AKAP450 (1390-1595) + RIIα-P; 6, GST-AKAP450 (2327-2602) + RIIα; 7, GST-AKAP450 (2327-2602) + RIIα-P; 8, GST-AKAP79 (178-427) + RIIα; 9, GST-AKAP149 (285-387) + RIIα. Immunodetection was with anti-hRIIα mAb.

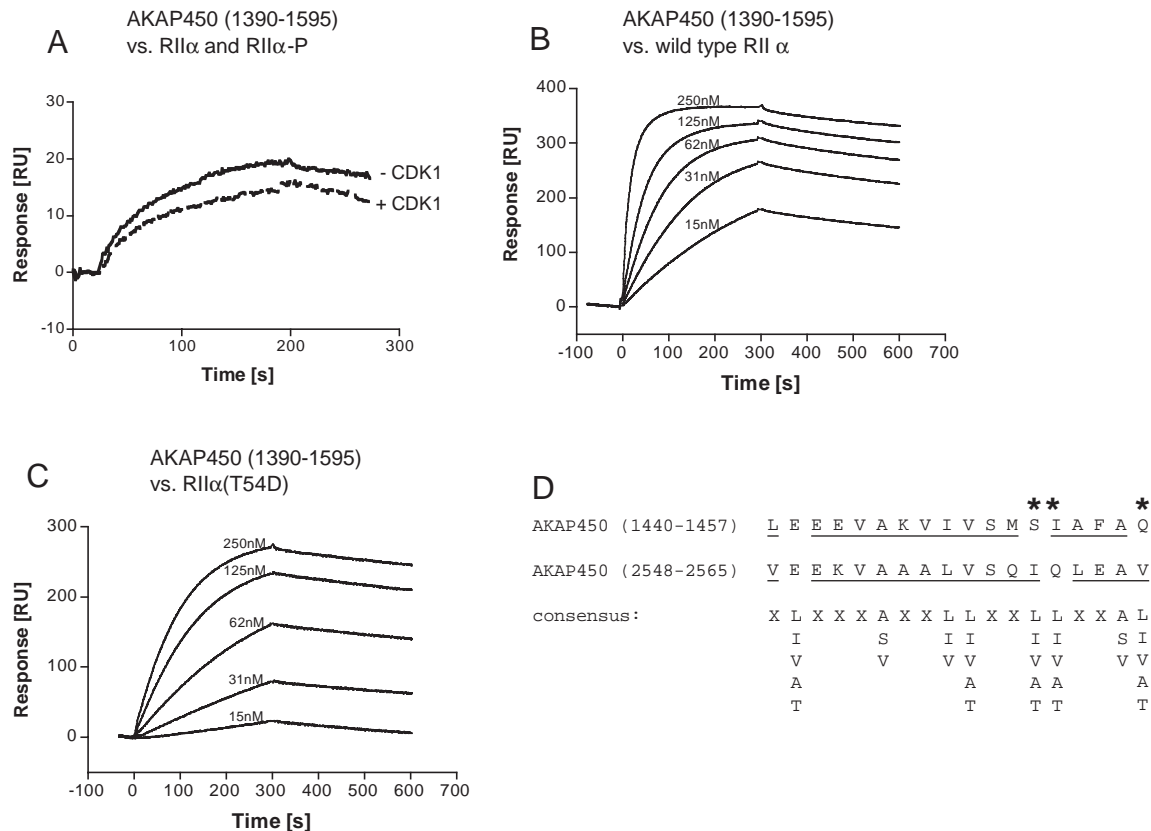

**Fig. 6.** Interaction of the AKAP450 N-terminal binding domain with wild-type hRII $\alpha$  (A,B) and hRII $\alpha$ (T54D) (C). A sensor chip with 60 RUs of 8-AHA-cAMP immobilized on each surface was used to capture (A) 120 RU and (B,C) 500 RU of the RII $\alpha$  subunit to a separate flow cell. (A) AKAP450 (1390-1595) (100 nM) was run over immobilized CDK1-phosphorylated (dotted line) and unphosphorylated (solid line) RII $\alpha$  for 180 seconds. The indicated concentrations of AKAP450 (1390-1595) were run over the immobilized wild-type hRII $\alpha$  (B) and hRII $\alpha$ (T54D) (C) subunits for 300 seconds and the association phases of AKAP450 (1390-1595) were monitored in 20 mM MOPS, pH 7.0, 150 mM NaCl, 1 mM DTT and 0.005% surfactant P20. The dissociation phase was monitored for another 300 seconds after omitting the AKAP from the running buffer. The immobilization of the R subunits and the regeneration are not shown. (D) Aligned sequences of the RII binding domains in AKAP450 along with the consensus binding sequence (Vijayaraghavan et al., 1999). \* denotes residues that differ between the two AKAP450 domains and from the consensus.

### CDK1 phosphorylation of RII $\alpha$ affects its affinity to the two RII-binding domains of AKAP450

Human RII $\alpha$  can be phosphorylated by both PKA and CDK1 (Keryer et al., 1998). We next compared the affinities of PKA- and CDK1-phosphorylated RII $\alpha$  to AKAP450. Two putative RII-binding domains have been reported in AKAP450 (Schmidt et al., 1999; Witczak et al., 1999). Both domains were expressed as GST fusion proteins: GST-AKAP450 (1390-1595) and GST-AKAP450 (2327-2602). Binding to AKAP450 was first assessed by RII-overlay technique using RII $\alpha$  phosphorylated by either PKA or CDK1 in the presence of [ $\gamma$ - $^{32}$ P]ATP. PKA-phosphorylated RII $\alpha$  appeared to bind more strongly to GST-AKAP450 (1390-1595) (Fig. 5A, lane 3) than to GST-AKAP450 (2327-2602) (lane 4). By contrast, CDK1-phosphorylated RII $\alpha$  bound more weakly to GST-AKAP450 (1390-1595) (Fig. 5B, lane 3) than to GST-AKAP450 (2327-2602) (lane 4). However, binding is not limited by the affinity in the filter assay. To analyze the RII $\alpha$ -AKAP450 interaction further in vitro, we did in-solution binding assays using GST precipitation to detect interactions. Purified recombinant human RII $\alpha$  was incubated with CDK1 prior to the binding assay and subjected to GST precipitation to analyze the effect

of phosphorylation of RII $\alpha$  on binding to AKAP450. As a control for the phosphorylation reaction, 50 ng of purified recombinant human RII $\alpha$  was incubated with CDK1 and ATP, and immunodetected with anti-RII $\alpha$  antibody. This demonstrated similar levels of RII $\alpha$  and phosphorylated RII $\alpha$

**Table 1. Apparent association and dissociation rate constants for interaction of wild-type and mutated human RII $\alpha$  with the two AKAP450 fragments\***

| Protein             | AKAP450 (1390-1595)          |                       |               | AKAP450 (2327-2602)          |                       |                 |
|---------------------|------------------------------|-----------------------|---------------|------------------------------|-----------------------|-----------------|
|                     | $K_a$<br>( $M^{-1} s^{-1}$ ) | $K_d$<br>( $s^{-1}$ ) | $K_D$<br>(nM) | $K_a$<br>( $M^{-1} s^{-1}$ ) | $K_d$<br>( $s^{-1}$ ) | $K_D$<br>(nM)   |
| RII $\alpha$ wt     | $8.6 \times 10^4$            | $5.4 \times 10^{-4}$  | $5 \pm 1$     | $1.2 \times 10^6$            | $4.3 \times 10^{-4}$  | $0.4 \pm 0.2$   |
| RII $\alpha$ (T54A) | $3.2 \times 10^4$            | $2.3 \times 10^{-4}$  | $7 \pm 1$     | $1.7 \times 10^6$            | $4.5 \times 10^{-4}$  | $0.3 \pm 0.1$   |
| RII $\alpha$ (T54L) | $3.2 \times 10^4$            | $2.5 \times 10^{-4}$  | $7 \pm 2$     | $1.7 \times 10^6$            | $2.3 \times 10^{-4}$  | $0.15 \pm 0.05$ |
| RII $\alpha$ (T54V) | $2.7 \times 10^4$            | $4.9 \times 10^{-4}$  | $18 \pm 5$    | $1.5 \times 10^6$            | $2.8 \times 10^{-4}$  | $0.2 \pm 0.05$  |
| RII $\alpha$ (T54D) | $2.2 \times 10^4$            | $4.5 \times 10^{-4}$  | $20 \pm 3$    | $1.6 \times 10^6$            | $3.9 \times 10^{-4}$  | $0.3 \pm 0.1$   |

RII-AKAP interaction was analysed as described in legend to Fig. 6. Apparent association ( $K_a$ ) and dissociation ( $K_d$ ) rate constants were calculated from three different independent experiments using global fit analysis as described elsewhere (Herberg et al., 2000).  $K_D = K_d/K_a$ .



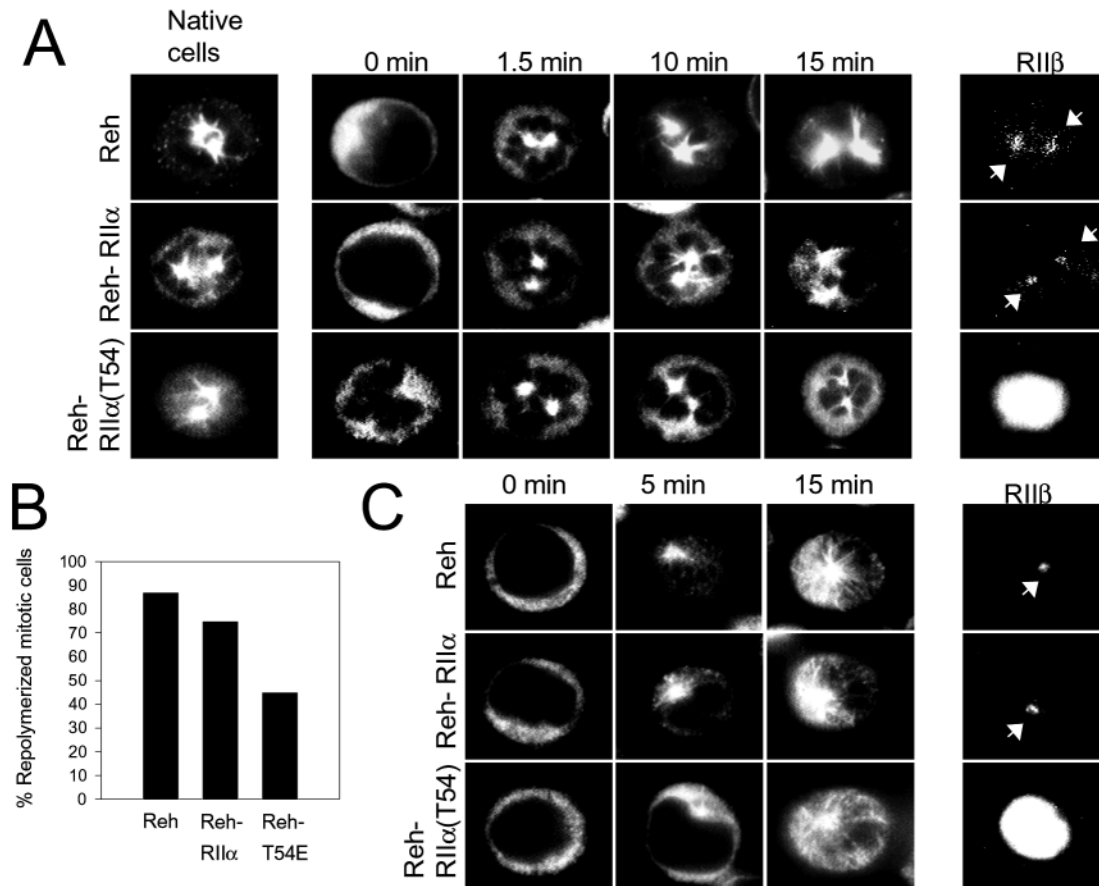

**Fig. 7.** Microtubuli repolymerization assays in mutant and wild-type RII $\alpha$ -transfected cells. Reh, Reh-RII $\alpha$  and Reh-RII $\alpha$ (T54E) cells were incubated for 1 hour at 4°C to depolymerize microtubules. Repolymerization was started by heating to 37°C and samples were stopped at different time points (0-15 minutes) by methanol fixation. Aster formation was then analyzed by immunofluorescence using anti- $\alpha$ -tubulin mAb. Mitotic (A) and interphase (C) cells were examined. The right-hand columns show staining by anti-RII $\beta$  antibody in cells prior to depolymerization. Arrows indicate the centrosomal association of RII $\beta$ . (B) The number of mitotic cells that formed asters after depolymerization was scored. Reh vs RII $\alpha$ ,  $P < 0.005$ ; Reh vs RII $\alpha$ (T54E),  $P < 0.001$ .

(Fig. 5C, lane 1 and 2). RII $\alpha$  (+/- CDK1 phosphorylation) was then diluted to 20 nM and mixed separately with 20 nM of different GST proteins. After CDK1 treatment, RII $\alpha$  showed low-level binding to GST-AKAP450 (1390-1595) (Fig. 5C, lane 5) compared to the binding of non-phosphorylated RII $\alpha$  to the AKAP (lane 4). Both phosphorylated and unphosphorylated RII $\alpha$  bound well to GST-AKAP450 (2327-2602) (Fig. 5C, lanes 6 and 7). These observations were consistent with the RII overlay data. As positive controls, we used GST-AKAP79 (178-427) (Fig. 5C, lane 8) and GST-AKAP149 (285-387) (lane 9), which precipitated similar amounts of unphosphorylated RII $\alpha$  to GST-AKAP450 (either binding domain; compare with lanes 4 and 6). Binding of RII $\alpha$ (T54E) to GST-AKAP450 (1390-1595) and GST-AKAP450 (2327-2602) was not affected by CDK1 (data not shown).

Next, SPR was used to investigate the binding of GST-AKAP450 (1390-1595) to unphosphorylated and CDK1-phosphorylated RII $\alpha$  immobilized to the same concentration on a cAMP surface. Before immobilization, RII $\alpha$  was incubated in presence or absence of CDK1 to yield a 70% stoichiometry of CDK1 phosphorylation. The phosphorylated and dephosphorylated RII $\alpha$  forms were then immobilized on

the cAMP surface and AKAP450 was passed over them (Fig. 6A). From the time-dependent association-dissociation curves, it appeared that unphosphorylated RII $\alpha$  bound better to AKAP450 (1390-1595) than CDK1-phosphorylated RII $\alpha$ . In addition, four different RII $\alpha$  mutants were analyzed for binding to AKAP450 (1390-1595) and AKAP450 (2327-2602) (Table 1). Wild-type RII $\alpha$ , RII $\alpha$ (T54A) and RII $\alpha$ (T54L) bound equally well to AKAP450 (1390-1595) ( $K_D$  of 5-7 nM). The RII $\alpha$ (T54D) is believed to mimic phosphorylation and bound with lower affinity to AKAP450 (1390-1595) (Fig. 6C, Table 1;  $K_D$  of 20 nM) than did wild-type RII $\alpha$  (Fig. 6B,  $K_D$  of 5 nM). The lower affinity of RII $\alpha$ (T54V) ( $K_D$  of 18 nM) might be explained by the insertion of a larger and more bulky residue than alanine or leucine. The four RII $\alpha$  mutants and the wild-type all bound strongly to the C-terminal domain of AKAP450 (2327-2602) with  $K_D$  values of 0.16-0.4 nM (Table 1). This is consistent with the notion that binding of RII $\alpha$  to AKAP450 (2327-2602) is not regulated by CDK1 phosphorylation. By comparison of the AKAP450 binding domains (Fig. 6D), the CDK1-sensitive N-terminal binding domain of AKAP450 differs from the C-terminal binding domain and from the consensus at positions 13 and 18, whereas the C-terminal binding domain differs from the consensus at position 14.

### Stability of microtubules in wild-type and mutant-RII $\alpha$ -transfected cell lines

PKA anchored at the centrosome and along microtubules has been implicated in regulation of microtubule stability (Lamb et al., 1991). We wanted to analyze the effect of the absence and presence of RII $\alpha$  on microtubule dynamics using the characterized cell lines Reh, Reh-RII $\alpha$  and Reh-RII $\alpha$ (T54E). To examine microtubule formation, cells were settled onto poly-L-lysine-coated coverslips and incubated for 1 hour at 4°C to depolymerize microtubules. Repolymerization was induced by adding conditioned medium (37°C) and stopped by ice-cold methanol fixation. Aster formation was analyzed at different time points (0-30 minutes) by immunofluorescence with anti- $\alpha$ -tubulin. Spindles were also examined in mitotic cells before depolymerization and appeared to be similar for all three cell lines (Fig. 7A). After depolymerization and initiation of repolymerization from mitotic centrosomes, microtubule formation had started and appeared to be similar after 1.5 minutes in all three cell lines (Fig. 7A, mitotic cells). For Reh and Reh-RII $\alpha$ , the asters extended with time and were after 10-15 minutes similar in size to spindles in native cells. Although aster formation also occurred in Reh-RII $\alpha$ (T54E) cells, the asters were distinctly smaller and did not extend with time (Fig. 7A, representative cell shown). The repolymerization frequency in the mitotic cells (prometaphase) was 87% for Reh cells, 75% for Reh-RII $\alpha$  and 45% for Reh-RII $\alpha$ (T54E) (Fig. 7B). We conclude that the repolymerization in Reh-RII $\alpha$ (T54E) mitotic cells was poor and occurred at a lower frequency. Microtubule repolymerization was also analyzed in interphase cells (Fig. 7C), where minor differences were observed that did not reach statistical significance. Furthermore, in native interphase cells, the microtubule network appeared to be similar in all the cell lines (not shown).

The centrosomal association of human RII $\beta$  is not regulated by CDK1 and RII $\beta$  remains associated with centrosomes during the whole cell cycle when present in cancer cell lines (Keryer et al., 1993). We examined the amount of RII $\beta$  in the three cell lines by immunofluorescence. RII $\beta$  was present in both interphase and mitotic centrosomes of Reh and Reh-RII $\alpha$  (Fig. 7A,C). By contrast, RII $\beta$  was not detected in the centrosomes of Reh-RII $\alpha$ (T54E) but rather had a cytoplasmic redistribution. We speculate that RII $\beta$  is depleted from the centrosomes in Reh-RII $\alpha$ (T54E) cells because RII $\alpha$ (T54E) has a higher affinity for the AKAP450 binding domains than RII $\beta$ .

## DISCUSSION

To address the mechanism of the previously described cell-cycle-dependent redistribution of RII $\alpha$  (Keryer et al., 1998), we established stable transfectants of a neoplastic B-lymphoid cell line expressing wild-type RII $\alpha$  or mutant RII $\alpha$ (T54E) where the CDK1 phosphorylation site T54 is changed to glutamic acid (T54E). Our data indicate that CDK1 phosphorylation of T54 in RII $\alpha$  might serve as a molecular switch that regulates the association and dissociation of PKA with the centrosome and AKAP450 based on the following observations. First, the location of RII $\alpha$  is cell-cycle-dependent, it associates with the centrosomes in interphase and dissociates at mitosis. Second, RII $\alpha$  is phosphorylated on T54 at mitosis and by the major mitotic kinase CDK1 *in vitro* (Keryer et al., 1998). Third, RII $\alpha$

is solubilized from purified nucleus-centrosome complexes or particular fractions after CDK1 treatment. Fourth, *in vitro*, CDK1 phosphorylation of RII $\alpha$  lowers the affinity of RII $\alpha$  for AKAP450, consistent with the observation that AKAP450 co-immunoprecipitated with RII $\alpha$  from interphase cells, but not mitotic cells. Fifth, the mutant RII $\alpha$ (T54E) is not phosphorylated or solubilized by CDK1 and does not dissociate from mitotic centrosomes. Altogether, these data indicate that CDK1 phosphorylation of RII $\alpha$  on T54 induces the dissociation of PKA from its centrosomal anchor at mitosis. Mutation of T54 to glutamic acid abolished this effect. The observation that mutation to glutamic acid mimicked the effect of dephosphorylated threonine and not phosphorylated threonine was somewhat surprising, and might be due to the fact that E or D mutations do not always have the ability to mimic a phospho-serine or phospho-threonine (Krek et al., 1992). However, our conclusions were confirmed by making additional T54 mutants. Threonine mutated to aspartic acid (T54D) or leucine (T54L) mimicked phosphorylated and dephosphorylated threonine, with respect to affinities for the N-terminal binding site in AKAP450.

The interaction of RII $\alpha$  with the N-terminal PKA binding domain in AKAP450 (1390-1595) was sensitive to CDK1 phosphorylation in filter overlay and GST precipitations. Furthermore, detailed analysis by SPR of the interaction of RII $\alpha$  with AKAP450 when RII $\alpha$  was immobilized on a cAMP chip showed clearly that binding to AKAP450 (1390-1595) was reduced when RII $\alpha$  was phosphorylated by CDK1 or when threonine was mutated to aspartic acid, mimicking a phospho-threonine. By contrast, binding to AKAP 450 (2327-2602) was not affected by any of the T54 mutations. The fact that mutagenesis did not affect binding to the C-terminal binding site could indicate that this site is not exposed on the surface of the native protein. Alternatively, this site might be occupied by RII $\beta$ . Preliminary data on affinity of RII $\beta$  to the N- and C-terminal binding sites of AKAP450 (not shown), indicate that the C-terminal site might be occupied by RII $\beta$ . Comparison of the two binding domains of AKAP450 might give some indication of determinants for sensitivity to CDK1 phosphorylation in the AKAP, but such determinants might also reside outside the consensus binding domain. The observation that mutation of T54 to large residues such as V and D (loss of binding) and E (strong binding) distinctly affect interaction with AKAP450 as well as with AKAP95 (Landsverk et al., 2001), could indicate that T54, in addition to the well-characterized dimerization- and AKAP-binding motif in RII $\alpha$  (Newlon et al., 1999), might be an important determinant for interaction with specific AKAPs. Although amino acids 45-75 in RII $\alpha$  is the region of RII $\alpha$  with the lowest conservation between species (Foss et al., 1997; Øyen et al., 1989), we found potential CDK1 phosphorylation sites in mouse (S49) and bovine (T53) RII $\alpha$  by homology alignment. Thus, CDK1 phosphorylation of T54 is not a mechanism specific for human RII $\alpha$  and cell-cycle-dependent redistribution of RII $\alpha$  subunit also appears to operate in other species. In the rat, however, RII $\alpha$  was not redistributed, which is consistent with the lack of an N-terminal CDK1 phosphorylation site in the rat sequence. Interestingly, RII $\beta$  seemed to associate more with mitotic chromatin in the rat (this study; Landsverk et al., 2001). To our knowledge, distribution of RII $\alpha$  and RII $\beta$  during the cell cycle has not been examined

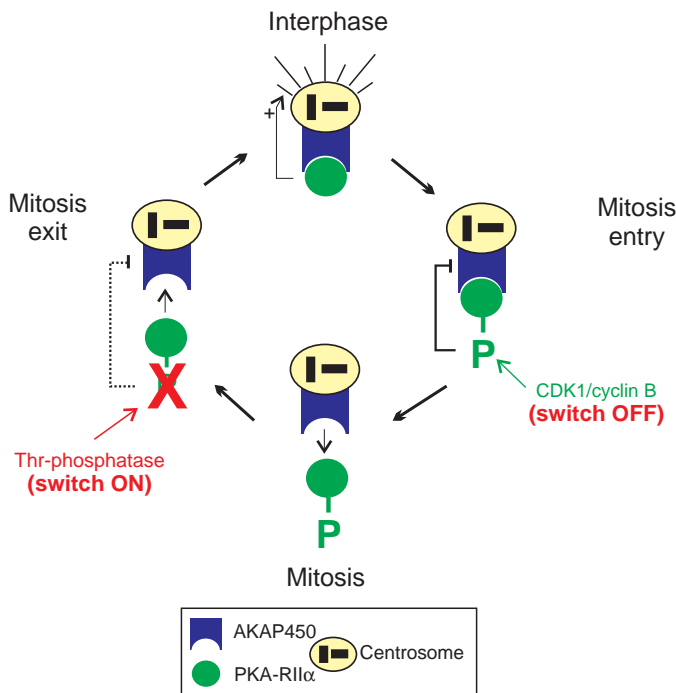

**Fig. 8.** CDK1 phosphorylation serves as a molecular switch that regulates the association of RII $\alpha$  with centrosomal AKAP450. We propose this model for the regulation of RII $\alpha$  association with AKAP450 by CDK1 phosphorylation. In interphase cells, unphosphorylated RII $\alpha$  is tightly bound to the centrosomes through interaction with AKAP450. At mitosis entry, RII $\alpha$  is phosphorylated at T54 by CDK1 and the centrosomal anchoring is disrupted. The binding is restored at mitosis exit by dephosphorylation of RII $\alpha$  by a threonine phosphatase.

in vivo in the rat. The observations made here might suggest some redistribution of RII $\beta$  instead of RII $\alpha$  in rat, which could be pursued in future studies.

PKA has been shown to be involved in maintenance of the interphase microtubule network (Fernandez et al., 1995). PKA also switches off the effect of the destabilizing factor stathmin, which in turn promotes increased tubulin polymerization (Gradin et al., 1998). Overexpression of stathmin mutants that cannot be phosphorylated prevents the assembly of the mitotic spindle (Gradin et al., 1998). To address the function of the PKA-AKAP450 complex associated with the centrosome, we analyzed the microtubule nucleating activity of the transfected cell lines and showed that absence or presence of PKA-RII $\alpha$  at mitosis had distinct effects on nucleation from mitotic centrosomes. This suggests that dissociation of PKA from the centrosome at mitosis is important for spindle formation. Based on our previous observations, centrosomal RII $\beta$  is present in differentiated non-dividing cells and in all cancer cell lines examined, but not in normal cycling cells (Keryer et al., 1999). For this reason, we examined levels of RII $\beta$  and found that Reh and Reh-RII $\alpha$  cells both had centrosomal RII $\beta$ . In the cell lines studied here, this might rescue effects that would come out more strongly in primary cycling cells. Also, requirements for accurate and timely progression through mitosis and segregation of chromosomes might be greater in the body than in cultured cancer cells and requirements for RII $\alpha$  redistribution correspondingly stronger. Another

possibility is that not all of PKA should be dissociated from centrosomes. This notion would be consistent with observations made with mutation of the PKA phosphorylation site in stathmin, which also produces aberrant spindle formation, indicating a PKA requirement either just before entry into mitosis or during mitosis.

In summary, we propose a model in which CDK1 phosphorylation of T54 in RII $\alpha$  acts as a molecular switch that regulates the association and dissociation of PKA with centrosomal AKAP450 (Fig. 8); preliminary data indicate a similar distribution of C subunit (data not shown). During interphase, PKA is localized to the centrosome through interaction of RII $\alpha$  with AKAP450. Upon mitosis entry, CDK1 is accumulated at the centrosome (Bailey et al., 1989) and RII $\alpha$  is phosphorylated on T54 by CDK1. The switch is turned off and PKA dissociates from the centrosomal AKAP450. At mitosis exit, a yet-unknown threonine phosphatase dephosphorylates RII $\alpha$  and turns the switch back. The affinity of RII $\alpha$  for AKAP450 is now higher and the PKA-RII $\alpha$ -AKAP450 complex reforms. In a parallel with this, we show an opposite situation with RII $\alpha$  interaction with AKAP95. CDK1 phosphorylation of RII $\alpha$  on T54 also seems to constitute a molecular switch controlling the association of PKA with chromosome-bound AKAP95 at mitosis (Landsverk et al., 2001; Collas et al., 1999). Anchoring of phosphorylated PKA to chromatin-associated AKAP95 is required to prevent premature decondensation of chromatin at mitosis. The two models fit together into a conceptual framework in which the association of RII $\alpha$  to the centrosome or chromatin is determined by the phosphorylation state of RII $\alpha$ , which is regulated by the mitotic kinase CDK1 and a threonine phosphatase. The threonine phosphatase, however, remains to be identified.

This work was supported by grants from The Norwegian Cancer Society, The Norwegian Research Council, The Foundation for Health and Rehabilitation, Novo Nordic Research Foundation and Anders Jahre's Foundation.

## REFERENCES

- Bailey, E., Doree, M., Nurse, P. and Bornens, M. (1989). p34cdc2 is located in both nucleus and cytoplasm; part is centrosomally associated at G2/M and enters vesicles at anaphase. *EMBO J.* **8**, 3985-3995.
- Bailey, E., Pines, J., Hunter, T. and Bornens, M. (1992). Cytoplasmic accumulation of cyclin B1 in human cells: association with a detergent-resistant compartment and with the centrosome. *J. Cell Sci.* **101**, 529-545.
- Beebe, S. J. and Corbin, J. D. (1986). Cyclic nucleotide-dependent protein kinases. In *The Enzymes* (ed. P. D. Boyer and E. G. Krebs), p. 43. Orlando: Academic Press.
- Bregman, D. B., Bhattacharyya, N. and Rubin, C. S. (1989). High affinity binding protein for the regulatory subunit of cAMP-dependent protein kinase II-B. Cloning, characterization, and expression of cDNAs for rat brain P150. *J. Biol. Chem.* **264**, 4648-4656.
- Buechler, Y. J., Herberg, F. W. and Taylor, S. S. (1993). Regulation-defective mutants of type I cAMP-dependent protein kinase. Consequences of replacing arginine 94 and arginine 95. *J. Biol. Chem.* **268**, 16495-16503.
- Collas, P., Courvalin, J. C. and Poccia, D. (1996). Targeting of membranes to sea urchin sperm chromatin is mediated by a lamin B receptor-like integral membrane protein. *J. Cell Biol.* **135**, 1715-1725.
- Collas, P., Le, G. K. and Taskén, K. (1999). The A-kinase-anchoring protein AKAP95 is a multivalent protein with a key role in chromatin condensation at mitosis. *J. Cell Biol.* **147**, 1167-1180.
- Colledge, M. and Scott, J. D. (1999). AKAPs: from structure to function. *Trends Cell Biol.* **9**, 216-221.



- Diviani, D., Langeberg, L. K., Doxsey, S. J. and Scott, J. D.** (2000). Pericentriolar anchors protein kinase A at the centrosome through a newly identified RII-binding domain. *Curr. Biol.* **10**, 417-420.
- Fernandez, A., Cavadore, J. C., Demaille, J. and Lamb, N.** (1995). Implications for cAMP-dependent protein kinase in the maintenance of the interphase state. *Prog. Cell Cycle Res.* **1**, 241-253.
- Foss, K. B., Solberg, R., Simard, J., Myklebust, F., Hansson, V., Jahnsen, T. and Taskén, K.** (1997). Molecular cloning, upstream sequence and promoter studies of the human gene for the regulatory subunit RII alpha of cAMP-dependent protein kinase. *Biochim. Biophys. Acta* **1350**, 98-108.
- Francis, S. H. and Corbin, J. D.** (1994). Structure and function of cyclic nucleotide-dependent protein kinases. *Annu. Rev. Physiol.* **56**, 237-272.
- Gradin, H. M., Larsson, N., Marklund, U. and Gullberg, M.** (1998). Regulation of microtubule dynamics by extracellular signals: cAMP-dependent protein kinase switches off the activity of oncoprotein 18 in intact cells. *J. Cell Biol.* **140**, 131-141.
- Herberg, F. W., Maleszka, A., Eide, T., Vossebein, L. and Taskén, K.** (2000). Analysis of A-kinase anchoring protein (AKAP) interaction with protein kinase A (PKA) regulatory subunits: PKA isoform specificity in AKAP binding. *J. Mol. Biol.* **298**, 329-339.
- Keryer, G., Luo, Z., Cavadore, J. C., Erlichman, J. and Bornens, M.** (1993). Phosphorylation of the regulatory subunit of type II beta cAMP-dependent protein kinase by cyclin B/p34cdc2 kinase impairs its binding to microtubule-associated protein 2. *Proc. Natl. Acad. Sci. USA.* **90**, 5418-5422.
- Keryer, G., Yassenko, M., Labbé, J. C., Castro, A., Lohmann, S. M., Evain-Brion, D. and Taskén, K.** (1998). Mitosis-specific phosphorylation and subcellular redistribution of the RIIalpha regulatory subunit of cAMP-dependent protein kinase. *J. Biol. Chem.* **273**, 34594-34602.
- Keryer, G., Skålhegg, B. S., Landmark, B. F., Hansson, V., Jahnsen, T. and Taskén, K.** (1999). Differential localization of protein kinase A type II isozymes in the Golgi-centrosomal area. *Exp. Cell Res.* **249**, 131-146.
- Krek, W., Marks, J., Schmitz, N., Nigg, E. A. and Simanis, V.** (1992). Vertebrate p34cdc2 phosphorylation site mutants: effects upon cell cycle progression in the fission yeast *Schizosaccharomyces pombe*. *J. Cell Sci.* **102**, 43-53.
- Labbé, J. C., Capony, J. P., Caput, D., Cavadore, J. C., Derancourt, J., Kaghad, M., Lelias, J. M., Picard, A. and Doree, M.** (1989). MPF from starfish oocytes at first meiotic metaphase is a heterodimer containing one molecule of cdc2 and one molecule of cyclin B. *EMBO J.* **8**, 3053-3058.
- Lamb, N. J., Cavadore, J. C., Labbé, J. C., Maurer, R. A. and Fernandez, A.** (1991). Inhibition of cAMP-dependent protein kinase plays a key role in the induction of mitosis and nuclear envelope breakdown in mammalian cells. *EMBO J.* **10**, 1523-1533.
- Landsverk, H. B., Carlson, C. R., Steen, R. L., Vossebein, L., Herberg, F. W., Taskén, K. and Collas, P.** (2001). Regulation of anchoring of the RIIa regulatory subunit of PKA to AKAP95 by Thr54 phosphorylation of RIIa: implication on chromosome dynamics at mitosis. *J. Cell Sci.* **114**, 3255-3264.
- Maro, B. and Bornens, M.** (1980). The centriole-nucleus association: effects of cytochalasin B and nocodazole. *Biol. Cell.* **39**, 287-290.
- Newlon, M. G., Roy, M., Morikis, D., Hausken, Z. E., Coghlan, V., Scott, J. D. and Jennings, P. A.** (1999). The molecular basis for protein kinase A anchoring revealed by solution NMR. *Nat. Struct. Biol.* **6**, 222-227.
- Øyen, O., Myklebust, F., Scott, J. D., Hansson, V. and Jahnsen, T.** (1989). Human testis cDNA for the regulatory subunit RII alpha of cAMP-dependent protein kinase encodes an alternate amino-terminal region. *FEBS Lett.* **246**, 57-64.
- Reinton, N., Collas, P., Haugen, T. B., Skålhegg, B. S., Hansson, V., Jahnsen, T. and Taskén, K.** (2000). Localization of a novel human A-kinase-anchoring protein, hAKAP220, during spermatogenesis. *Dev. Biol.* **223**, 194-204.
- Schmidt, P. H., Dransfield, D. T., Claudio, J. O., Hawley, R. G., Trotter, K. W., Milgram, S. L. and Goldenring, J. R.** (1999). AKAP350, a multiply spliced protein kinase A-anchoring protein associated with centrosomes. *J. Biol. Chem.* **274**, 3055-3066.
- Scott, J. D.** (1991). Cyclic nucleotide-dependent protein kinases. *Pharmacol. Ther.* **50**, 123-145.
- Skålhegg, B. S. and Taskén, K.** (1997). Specificity in the cAMP/PKA signaling pathway. Differential expression, regulation, and subcellular localization of subunits of PKA. *Front. Biosci.* **2**, d331-d342.
- Stenberg, M. and Nygren, H.** (1991). Computer simulation of surface-induced aggregation of ferritin. *Biophys. Chem.* **41**, 131-141.
- Szabo, A., Stolz, L. and Granzow, R.** (1995). Surface plasmon resonance and its use in biomolecular interaction analysis (BIA). *Curr. Opin. Struct. Biol.* **5**, 699-705.
- Takahashi, M., Shibata, H., Shimakawa, M., Miyamoto, M., Mukai, H. and Ono, Y.** (1999). Characterization of a novel giant scaffolding protein, CG-NAP, that anchors multiple signaling enzymes to centrosome and the Golgi apparatus. *J. Biol. Chem.* **274**, 17267-17274.
- Taskén, K., Andersson, K. B., Skålhegg, B. S., Taskén, K. A., Hansson, V., Jahnsen, T. and Blomhoff, H. K.** (1993). Reciprocal regulation of mRNA and protein for subunits of cAMP-dependent protein kinase (RI alpha and C alpha) by cAMP in a neoplastic B cell line (Reh). *J. Biol. Chem.* **268**, 23483-23489.
- Vijayaraghavan, S., Liberty, G. A., Mohan, J., Winfrey, V. P., Olson, G. E. and Carr, D. W.** (1999). Isolation and molecular characterization of AKAP110, a novel, sperm-specific protein kinase A-anchoring protein. *Mol. Endocrinol.* **13**, 705-717.
- Witczak, O., Skålhegg, B. S., Keryer, G., Bornens, M., Taskén, K., Jahnsen, T. and Ørstavik, S.** (1999). Cloning and characterization of a cDNA encoding an A-kinase anchoring protein located in the centrosome, AKAP450. *EMBO J.* **18**, 1858-1868.
